# Supplementary material for: Synthesis and characterization of polyoxometalate-based silver(i) phenylethynide compounds with antibacterial and antifungal activities
Source: Royal Society of Chemistry journal article supplement (doi:10.1039/c7ce00180k), 2017-01-01
Supplement: c7ce00180k1.pdf [file c7ce00180k1.pdf]

## Synthesis and Characterization of Polyoxometalate-based Silver(I) Phenylethyne Compounds with Antibacterial and Antifungal Activities

### Supporting Information

**Table S1.** X-ray crystal data and structure refinement parameters.

| Compound          | <b>1</b>                                                                                     | <b>2</b>                                                                                           | <b>3</b>                                                                                                        | <b>4</b>                                                                                              | <b>5</b>                                                                                                           | <b>6</b>                                                                                               |
|-------------------|----------------------------------------------------------------------------------------------|----------------------------------------------------------------------------------------------------|-----------------------------------------------------------------------------------------------------------------|-------------------------------------------------------------------------------------------------------|--------------------------------------------------------------------------------------------------------------------|--------------------------------------------------------------------------------------------------------|
| Empirical formula | C <sub>37</sub> H <sub>32</sub> Ag <sub>5</sub> F <sub>3</sub> O <sub>5</sub> S <sub>3</sub> | C <sub>24</sub> H <sub>53</sub> Ag <sub>4</sub> O <sub>48</sub> PS <sub>8</sub><br>W <sub>12</sub> | C <sub>24</sub> H <sub>53</sub> Ag <sub>4</sub> Mo <sub>12</sub> O <sub>4</sub><br><sub>8</sub> PS <sub>8</sub> | C <sub>28</sub> H <sub>65</sub> Ag <sub>5</sub> O <sub>50</sub> S <sub>10</sub> S<br>iW <sub>12</sub> | C <sub>84</sub> H <sub>100</sub> Ag <sub>12</sub> O <sub>50</sub> S <sub>1</sub><br><sub>0</sub> SiW <sub>12</sub> | C <sub>144</sub> H <sub>132</sub> Ag <sub>19</sub> O <sub>50</sub> P<br>S <sub>8</sub> W <sub>12</sub> |
| Formula weight    | 1249.16                                                                                      | 4034.79                                                                                            | 2979.87                                                                                                         | 4296.04                                                                                               | 5758.97                                                                                                            | 7205.68                                                                                                |
| Crystal system    | Monoclinic                                                                                   | Monoclinic                                                                                         | Monoclinic                                                                                                      | Triclinic                                                                                             | Monoclinic                                                                                                         | Triclinic                                                                                              |
| Space group       | <i>C2/c</i> (No. 15)                                                                         | <i>C2/c</i> (No. 15)                                                                               | <i>C2/c</i> (No. 15)                                                                                            | <i>P</i> -1 (No. 2)                                                                                   | <i>C2/c</i> (No. 15)                                                                                               | <i>P</i> -1 (No. 2)                                                                                    |
| <i>a</i> [Å]      | 33.174(4)                                                                                    | 17.0815(6)                                                                                         | 16.9657(8)                                                                                                      | 13.5633(6)                                                                                            | 20.6616(12)                                                                                                        | 13.6613(15)                                                                                            |
| <i>b</i> [Å]      | 8.3649(5)                                                                                    | 17.3104(5)                                                                                         | 17.2724(8)                                                                                                      | 15.5962(6)                                                                                            | 22.0358(12)                                                                                                        | 18.0152(9)                                                                                             |
| <i>c</i> [Å]      | 32.717(4)                                                                                    | 25.7879(9)                                                                                         | 25.7174(12)                                                                                                     | 18.8084(9)                                                                                            | 30.4391(18)                                                                                                        | 18.7774(6)                                                                                             |
| <i>α</i> [°]      | 90                                                                                           | 90                                                                                                 | 90                                                                                                              | 86.273(4)                                                                                             | 90                                                                                                                 | 93.702(3)                                                                                              |
| <i>β</i> [°]      | 114.198(14)                                                                                  | 106.596(4)                                                                                         | 106.578(5)                                                                                                      | 85.954(4)                                                                                             | 105.960(6)                                                                                                         | 101.547(6)                                                                                             |
| <i>γ</i> [°]      | 90                                                                                           | 90                                                                                                 | 90                                                                                                              | 85.935(4)                                                                                             | 90                                                                                                                 | 101.388(7)                                                                                             |

|                                          |            |           |           |           |             |           |
|------------------------------------------|------------|-----------|-----------|-----------|-------------|-----------|
| $V[\text{\AA}^3]$                        | 8281.1(15) | 7307.5(4) | 7222.9(6) | 3951.5(3) | 13324.6(13) | 4412.5(6) |
| $Z$                                      | 8          | 4         | 4         | 2         | 4           | 1         |
| $D_{\text{calc}}(\text{g}/\text{cm}^3)$  | 2.004      | 3.667     | 2.74      | 3.611     | 2.871       | 2.712     |
| $\mu(\text{Mo-K}\alpha)(\text{mm}^{-1})$ | 2.527      | 20.186    | 3.41      | 18.961    | 12.266      | 10.009    |
| $F(000)$                                 | 4832       | 7200      | 5664      | 3860      | 10520       | 3320      |
| Reflections collected                    | 15821      | 20072     | 14762     | 27649     | 23962       | 42160     |
| Independent reflections                  | 7273       | 6438      | 6351      | 13878     | 11713       | 15225     |
| Observed reflections<br>[ $I > 2s(I)$ ]  | 4323       | 5619      | 5702      | 8789      | 7275        | 10780     |
| Parameters                               | 1467       | 470       | 468       | 1021      | 772         | 1074      |
| Goodness-of-fit                          | 1.193      | 1.219     | 1.127     | 1.091     | 1.204       | 0.956     |
| $R_1[I > 2s(I)]^a$                       | 0.061      | 0.103     | 0.166     | 0.073     | 0.057       | 0.036     |
| $wR_2(\text{all data})^b$                | 0.074      | 0.222     | 0.314     | 0.082     | 0.089       | 0.078     |

$$^a R_1 = \frac{\sum ||F_o| - |F_c||}{\sum |F_o|} \quad ^b wR_2 = \left\{ \frac{\sum [w(F_o^2 - F_c^2)^2]}{\sum [w(F_o^2)^2]} \right\}^{1/2}$$

**Table S2.** Selected bond lengths (Å) for **1–6**.

|           |          |           |           |           |          |
|-----------|----------|-----------|-----------|-----------|----------|
| <b>1</b>  |          |           |           |           |          |
| C1≡C2     | 1.194(1) | C9≡C10    | 1.210(9)  | C17≡C18   | 1.181(9) |
| C25≡C26   | 1.208(1) | Ag1-C1    | 2.074(8)  | Ag4-C1#1  | 2.531(7) |
| Ag2-C1    | 2.412(7) | Ag3-C9    | 2.066(8)  | Ag2-C9    | 2.364(9) |
| Ag5-C9#4  | 2.374(7) | Ag3-C17   | 2.091(8)  | Ag4-C17   | 2.481(7) |
| Ag5-C17#1 | 2.572(9) | Ag2-C17#2 | 2.531(7)  | Ag5-C25   | 2.337(7) |
| Ag1-C25   | 2.045(8) | Ag4-C25   | 2.380(8)  | Ag1⋯Ag4#1 | 2.969(1) |
| Ag1⋯Ag2   | 2.996(8) | Ag1⋯Ag5#1 | 3.118(10) | Ag1⋯Ag5   | 3.132(9) |
| Ag1⋯Ag4   | 3.013(1) | Ag1⋯Ag3   | 3.158(8)  | Ag2⋯Ag3#2 | 2.943(9) |
| Ag2⋯Ag5#3 | 3.252(1) | Ag3⋯Ag2   | 3.058(1)  | Ag3⋯Ag4   | 2.979(8) |
| Ag3⋯Ag5#1 | 2.979(1) | Ag5⋯Ag3#1 | 2.979(1)  | Ag4-O2    | 2.311(6) |
| Ag5⋯Ag3#4 | 3.140(9) | Ag2-O1    | 2.318(6)  |           |          |
| <b>2</b>  |          |           |           |           |          |
| C7≡C8     | 1.220(7) | Ag2⋯Ag1#1 | 2.905(6)  | Ag1-O1    | 2.500(3) |
| Ag1-C8    | 2.320(1) | Ag2⋯Ag2#1 | 2.907(7)  | Ag1-O21   | 2.270(3) |
| Ag2-C8    | 2.130(4) | Ag1⋯Ag2   | 2.898(6)  | Ag2-O22   | 2.110(3) |
| Ag2-O23   | 2.450(3) | Ag1-O24   | 2.440(3)  |           |          |
| <b>3</b>  |          |           |           |           |          |
| C1≡C2     | 1.180(6) | Ag1-C1    | 2.323(10) | Ag2-C1    | 2.150(3) |
| Ag1⋯Ag2   | 2.894(4) | Ag2⋯Ag2#1 | 2.907(6)  | Ag1⋯Ag2#1 | 2.908(5) |
| Ag2-O1    | 2.440(3) | Ag2-O2    | 2.130(3)  | Ag1-O3    | 2.440(3) |
| Ag1-O4    | 2.240(3) | Ag1-O5    | 2.520(2)  |           |          |
| <b>4</b>  |          |           |           |           |          |
| C1≡C2     | 1.200(2) | Ag3⋯Ag5   | 2.885(2)  | Ag2-O42   | 2.572(1) |

|           |          |             |          |             |          |
|-----------|----------|-------------|----------|-------------|----------|
| Ag2-C1    | 2.380(2) | Ag4···Ag5   | 2.879(3) | Ag3-O46     | 2.177(1) |
| Ag3-C1    | 2.173(2) | Ag1-O43     | 2.220(1) | Ag3-O43     | 2.462(1) |
| Ag4-C1    | 2.250(2) | Ag1-O42     | 2.242(1) | Ag4-O48     | 2.219(1) |
| Ag5-C1    | 2.242(2) | Ag1-O41     | 2.301(2) | Ag4-O47     | 2.260(2) |
| Ag2-C2    | 2.390(2) | Ag1-O37     | 2.534(1) | Ag5-O50     | 2.253(1) |
| Ag2···Ag3 | 3.002(2) | Ag2-O45     | 2.256(1) | Ag5-O49     | 2.310(1) |
| Ag3···Ag4 | 2.809(3) | Ag2-O44     | 2.370(2) |             |          |
| <b>5</b>  |          |             |          |             |          |
| C1≡C2     | 1.176(2) | Ag6-C17     | 2.111(2) | Ag3···Ag6   | 3.062(2) |
| C9≡C10    | 1.180(2) | Ag7-C17     | 2.431(1) | Ag3···Ag2#1 | 3.223(2) |
| C17≡C18   | 1.192(2) | Ag7-C18     | 2.644(1) | Ag4···Ag5   | 2.925(2) |
| C25≡C26   | 1.166(2) | Ag4-C25     | 2.094(2) | Ag4···Ag7#1 | 2.960(2) |
| Ag2-C1    | 2.404(2) | Ag5-C25     | 2.313(2) | Ag4···Ag6   | 3.161(1) |
| Ag3-C1    | 2.288(2) | Ag7-C25#1   | 2.305(2) | Ag5···Ag6   | 3.074(2) |
| Ag4-C1    | 2.082(2) | Ag1···Ag3   | 2.893(2) | Ag6···Ag7   | 3.164(2) |
| Ag2-C2    | 2.705(2) | Ag1···Ag2   | 3.010(2) | Ag2-O2      | 2.406(1) |
| Ag1-C9    | 2.180(2) | Ag2···Ag6   | 3.154(2) | Ag3-O5      | 2.284(1) |
| Ag2-C9    | 2.393(2) | Ag2···Ag3#1 | 3.223(2) | Ag5-O1      | 2.347(1) |
| Ag3-C9#1  | 2.293(2) | Ag2···Ag4   | 3.307(2) | Ag5-O4      | 2.393(1) |
| Ag2-C17   | 2.573(1) | Ag2···Ag3   | 3.320(2) | Ag7-O3      | 2.319(1) |
| Ag5-C17   | 2.440(1) | Ag3···Ag4   | 3.010(2) | Ag7-O4      | 2.464(1) |
| <b>6</b>  |          |             |          |             |          |
| C1≡C2     | 1.218(1) | Ag8-C33     | 2.114(9) | Ag2···Ag5   | 3.097(1) |
| C9≡C10    | 1.232(1) | Ag9-C33#2   | 2.420(9) | Ag2···Ag3   | 3.103(1) |
| C17≡C18   | 1.173(1) | Ag10-C33    | 2.520(9) | Ag2···Ag7   | 3.112(1) |
| C25≡C26   | 1.245(1) | Ag5-C34     | 2.656(8) | Ag3···Ag4   | 2.836(7) |

|           |           |            |          |            |          |
|-----------|-----------|------------|----------|------------|----------|
| C33≡C34   | 1.227(1)  | Ag6-C41    | 2.056(9) | Ag3⋯Ag6    | 3.203(1) |
| C41≡C42   | 1.217(1)  | Ag10-C41   | 2.438(1) | Ag5⋯Ag7    | 2.981(9) |
| C49≡C50   | 1.223(1)  | Ag1-C42#1  | 2.643(9) | Ag5⋯Ag6    | 2.991(1) |
| C57≡C58   | 1.215(1)  | Ag7-C49    | 2.078(9) | Ag5⋯Ag8    | 3.225(1) |
| Ag1-C1    | 2.203(9)  | Ag9-C49    | 2.545(9) | Ag6⋯Ag10   | 3.074(1) |
| Ag2-C1    | 2.220(1)  | Ag10-C49   | 2.657(8) | Ag7⋯Ag8    | 3.070(1) |
| Ag3-C1    | 2.278(9)  | Ag1-C49#1  | 2.592(9) | Ag7⋯Ag9    | 3.079(1) |
| Ag2-C9    | 2.281(8)  | Ag8-C57    | 2.114(9) | Ag7⋯Ag10   | 3.120(1) |
| Ag5-C9    | 2.337(9)  | Ag9-C57    | 2.401(9) | Ag8⋯Ag9#2  | 2.922(1) |
| Ag7-C9    | 2.114(8)  | Ag10-C57#2 | 2.299(8) | Ag8⋯Ag9    | 2.992(9) |
| Ag3-C17   | 2.521(9)  | Ag1⋯Ag3    | 2.899(1) | Ag8⋯Ag10   | 3.111(1) |
| Ag5-C17   | 2.415(10) | Ag1⋯Ag4    | 2.918(9) | Ag8⋯Ag10#2 | 3.165(1) |
| Ag6-C17   | 2.103(9)  | Ag1⋯Ag6#1  | 3.134(1) | Ag9⋯Ag10#2 | 3.086(1) |
| Ag4-C25   | 2.108(9)  | Ag1⋯Ag2    | 3.138(1) | Ag3-O1W    | 2.396(7) |
| Ag3-C25#1 | 2.450(8)  | Ag1⋯Ag10#1 | 3.367(1) | Ag9-O23    | 2.300(6) |
| Ag5-C33   | 2.499(9)  | Ag2⋯Ag4    | 3.024(9) | Ag5-O24    | 2.395(7) |

<sup>a</sup> Symmetry transformations used to generate equivalent atoms:

For **1**: #1  $-x + 0.5, -y + 1.5, -z + 2$ ; #2  $-x + 0.5, -y + 2.5, -z + 2$ ; #3  $x, y + 1, z$ ; #4  $x, y - 1, z$ .

For **2**: #1  $-x + 1, y, -z + 1.5$ .

For **3**: #1  $-x + 1, y, -z + 1.5$ .

For **5**: #1  $-x, y, -z + 1.5$ .

For **6**: #1  $-x + 1, -y + 2, -z + 1$ ; #2  $-x + 2, -y + 2, -z + 1$ .

**Table S3.** Antibacterial and antifungal activities of **1-5** compared with gentamicin or amphotericin B.

| The diameters of antibacterial or antifungal laps (mm) |            |            |             |            |            |                |
|--------------------------------------------------------|------------|------------|-------------|------------|------------|----------------|
| Bacterial species                                      | <b>1</b>   | <b>2</b>   | <b>3</b>    | <b>4</b>   | <b>5</b>   | Gentamicin     |
| <i>B. pumilus</i>                                      | 11.5 ± 0.5 | 11         | 11.7 ± 0.6  | 9.3 ± 0.6  | 12.3 ± 0.6 | 27 ± 1         |
| <i>B. subtilis</i>                                     | 11.3 ± 0.6 | 10.3 ± 0.6 | 9.3 ± 0.6   | 9.2 ± 0.3  | 11.7 ± 0.6 | 26.8 ± 0.3     |
| <i>S. aureus</i>                                       | 15.7 ± 0.6 | 13.3 ± 0.6 | 12.7 ± 0.63 | 13.3 ± 0.6 | 16.5 ± 0.5 | 15.2 ± 0.3     |
| <i>E. coli</i>                                         | 17.7 ± 0.6 | 12.7 ± 0.6 | 14.5 ± 0.5  | 15.7 ± 1.2 | 18.8 ± 0.3 | 15.7 ± 0.6     |
| Fungi species                                          | <b>1</b>   | <b>2</b>   | <b>3</b>    | <b>4</b>   | <b>5</b>   | Amphotericin B |
| <i>A. niger</i>                                        | 9.3 ± 0.6  | 8.8 ± 0.8  | 9.7 ± 0.6   | 8.7 ± 0.6  | 10.2 ± 0.3 | 12.3 ± 0.3     |
| <i>C. albicans</i>                                     | 15.7 ± 1.2 | 15.8 ± 0.8 | 14.5 ± 0.5  | 12.7 ± 1.2 | 16.5 ± 1.5 | 16 ± 0.5       |

Gentamicin and amphotericin B are used as standards. The experiments are repeated three times, and the averages of inhibition zone values are taken.

**Figure S1.** Experimental (red) and simulated (black) X-ray powder diffraction patterns for **1-5**.

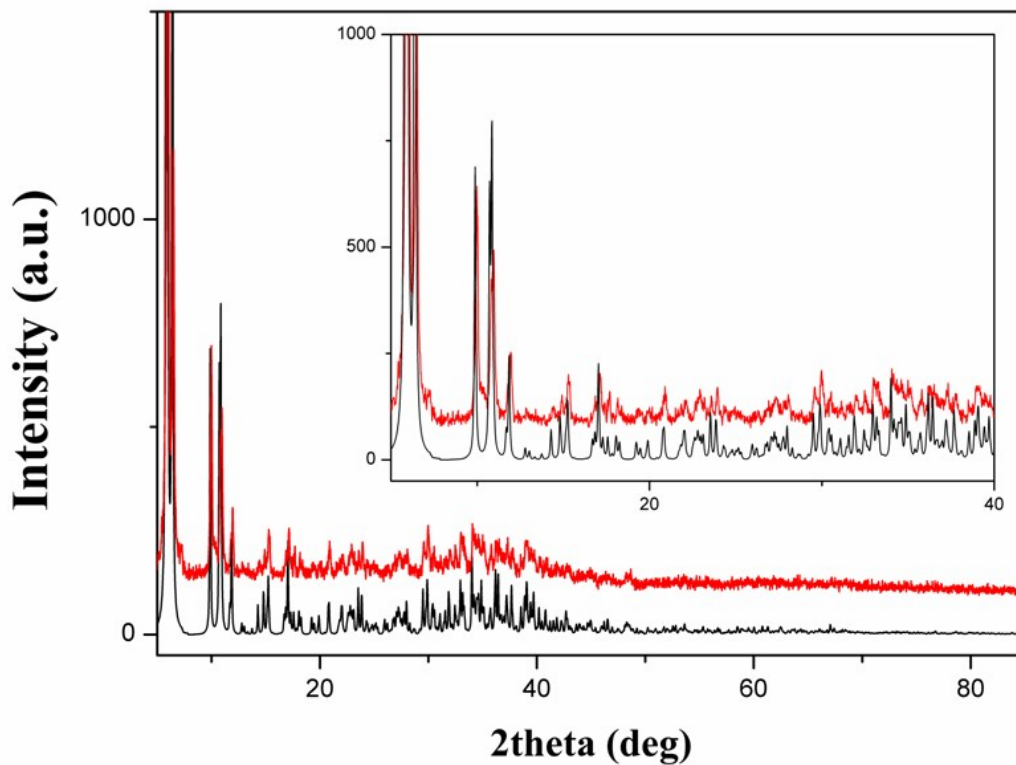

(1)

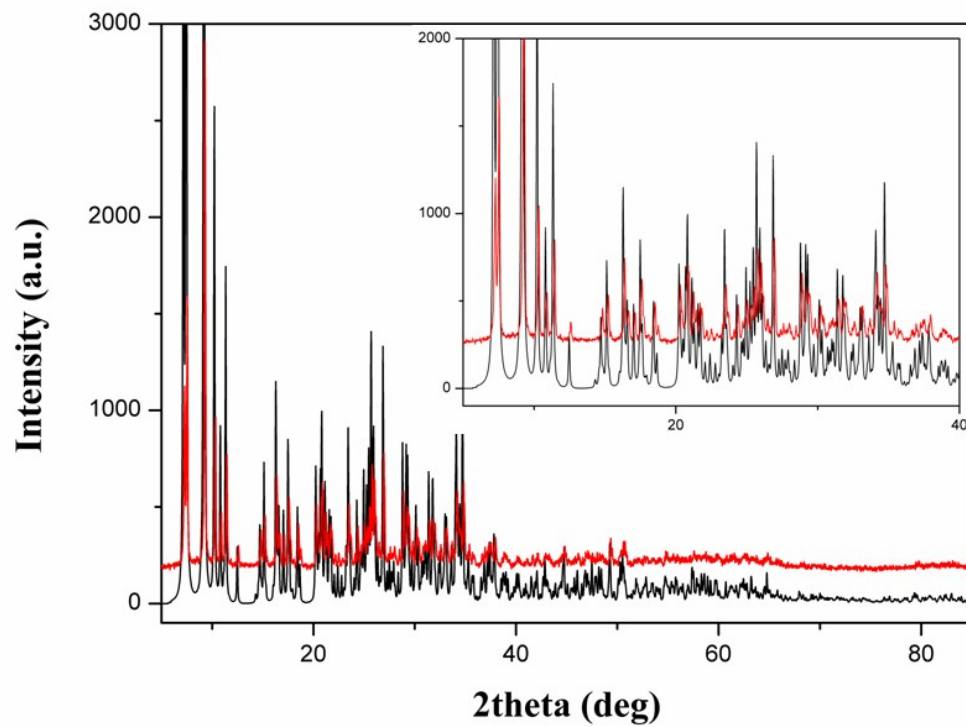

(2)

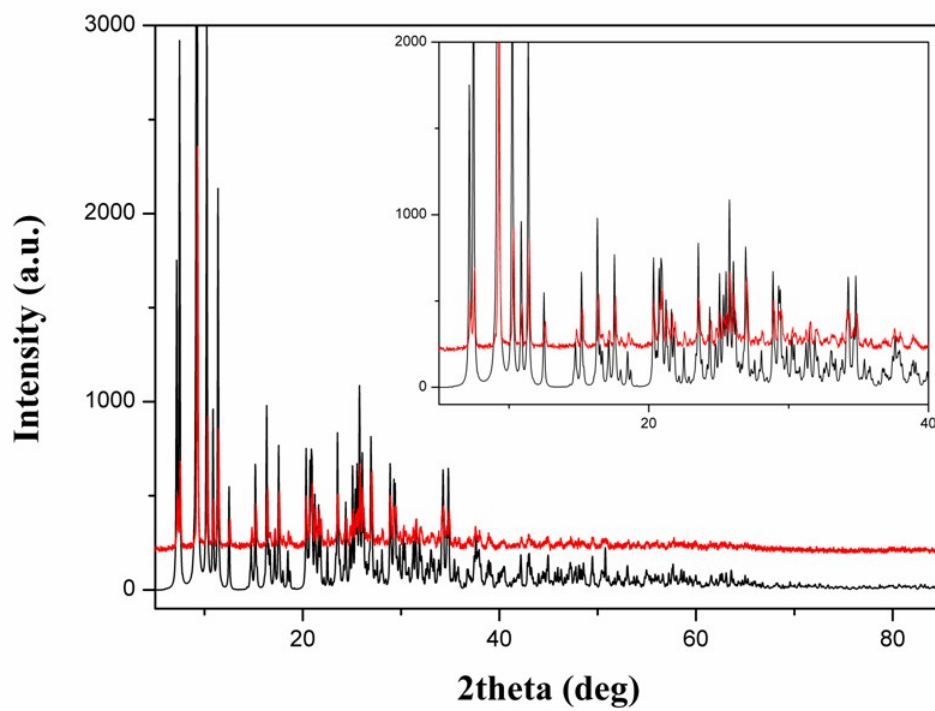

(3)



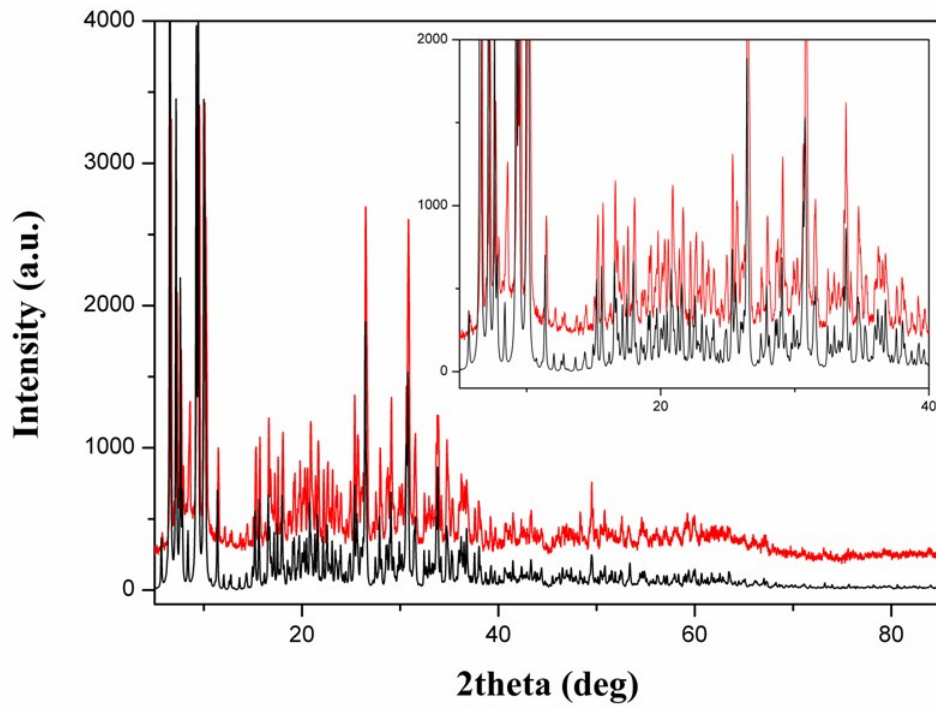

(4)

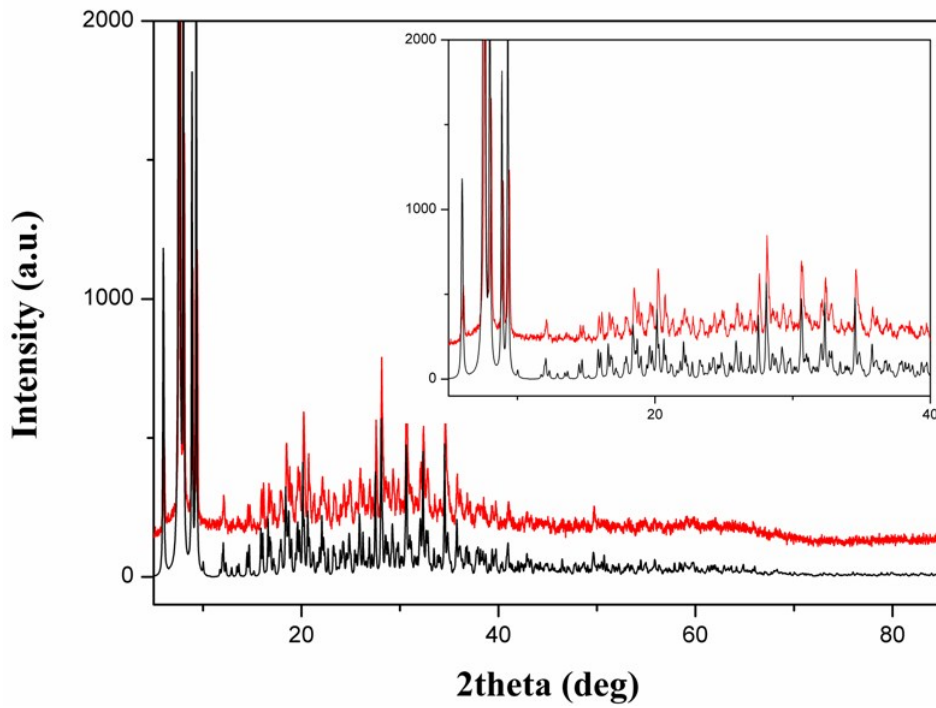

(5)

**Figure S2.** TGA curves for **1-5**.

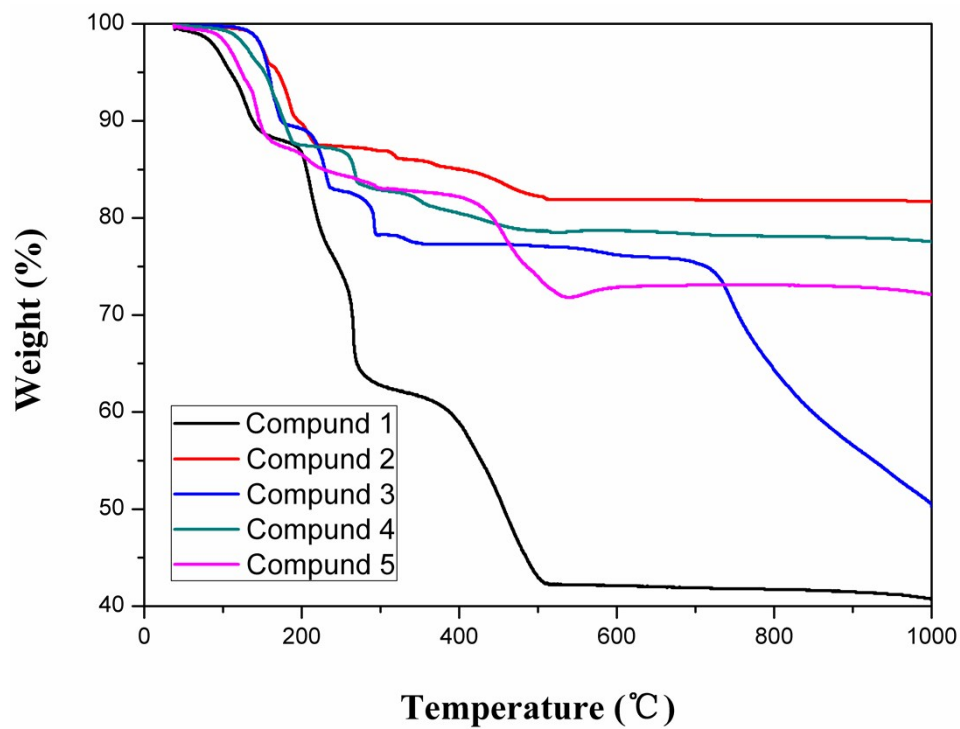

**Figure S3.** The infrared spectra of 1-5.

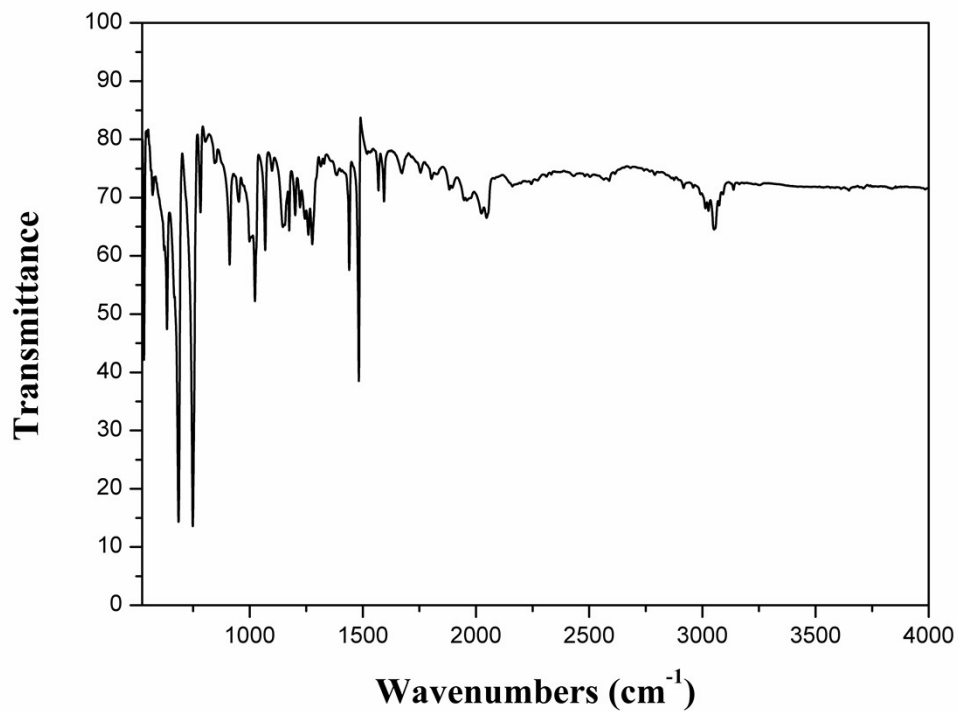

(1)

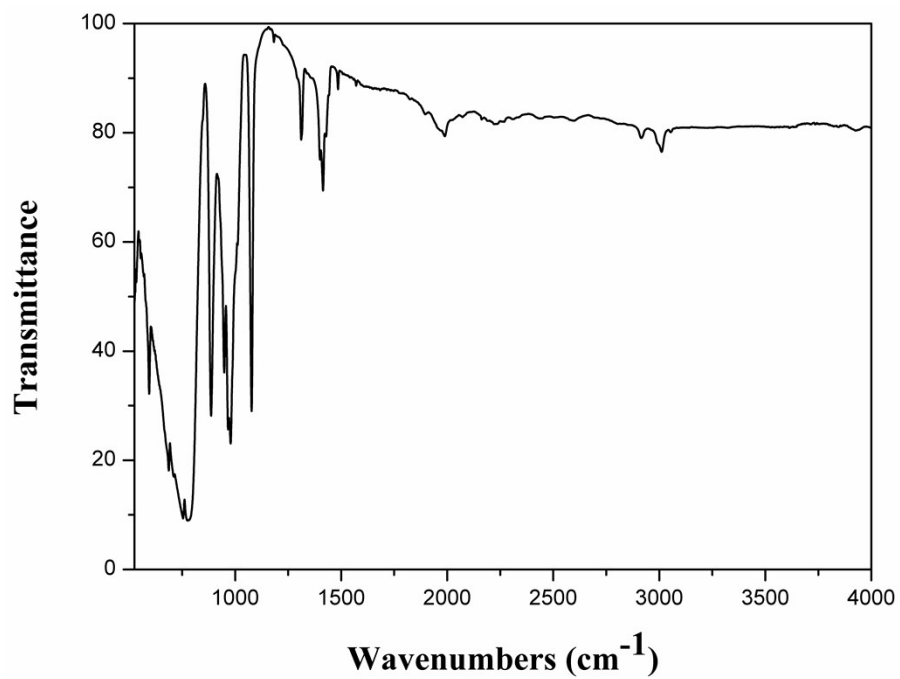

(2)

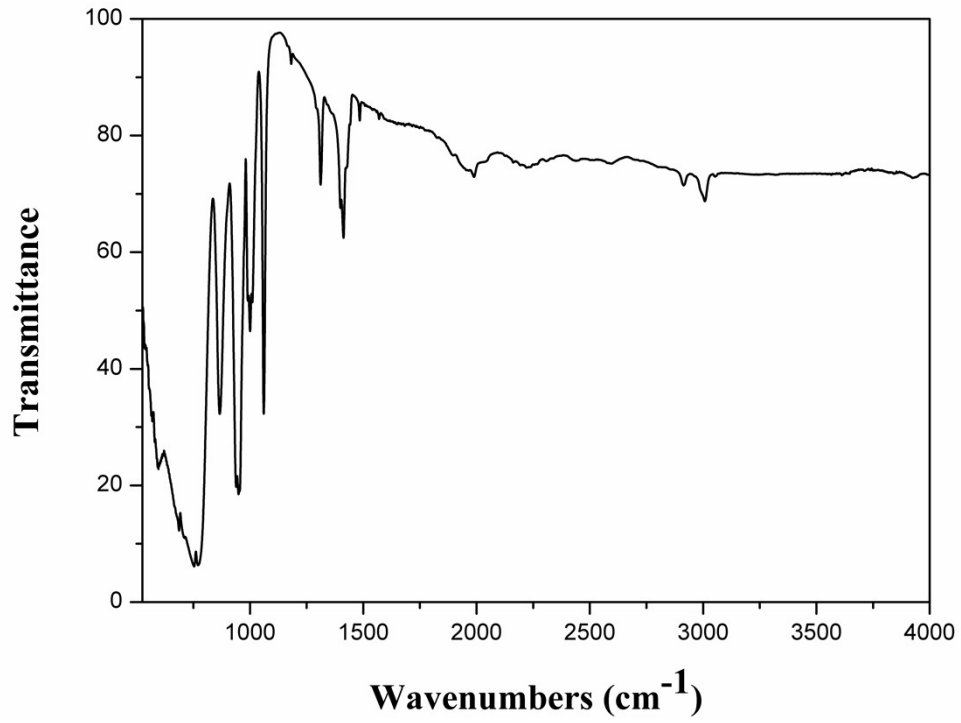

(3)

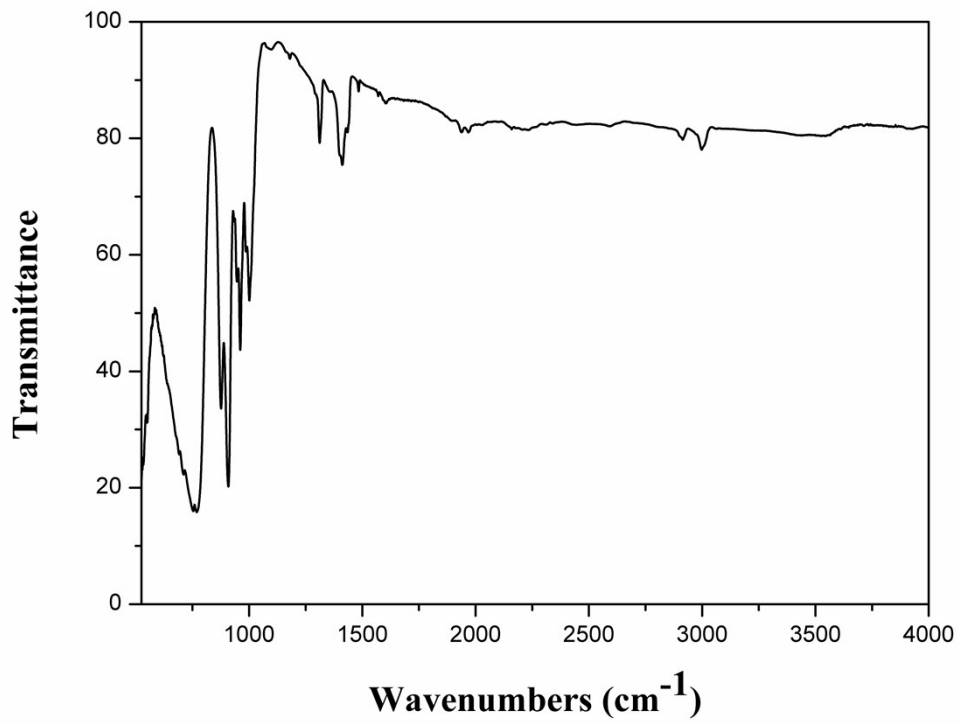

(4)

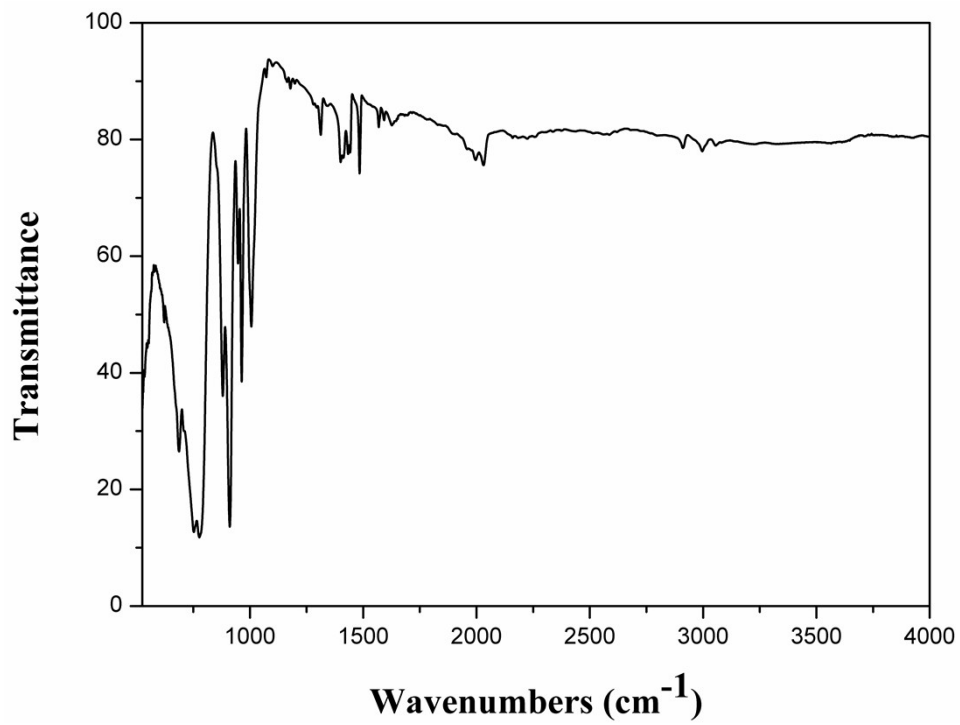

(5)

**Figure S4.** UV-visible absorption spectra of **1-5**.

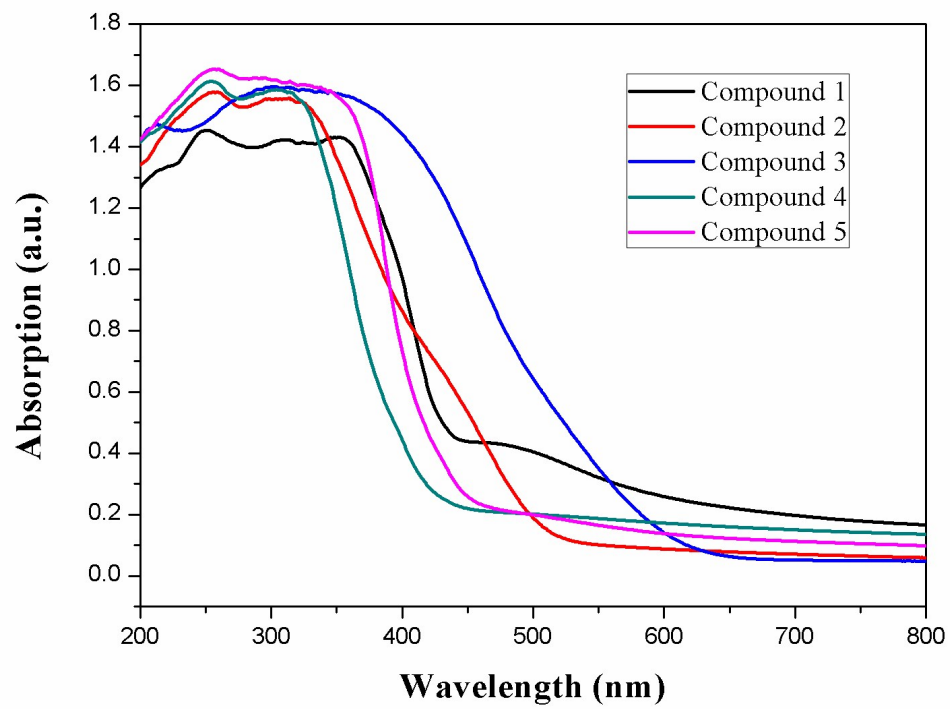

**Figure S5.** UV-visible diffuse reflectance spectra and optical band gaps of compounds **1-5**.

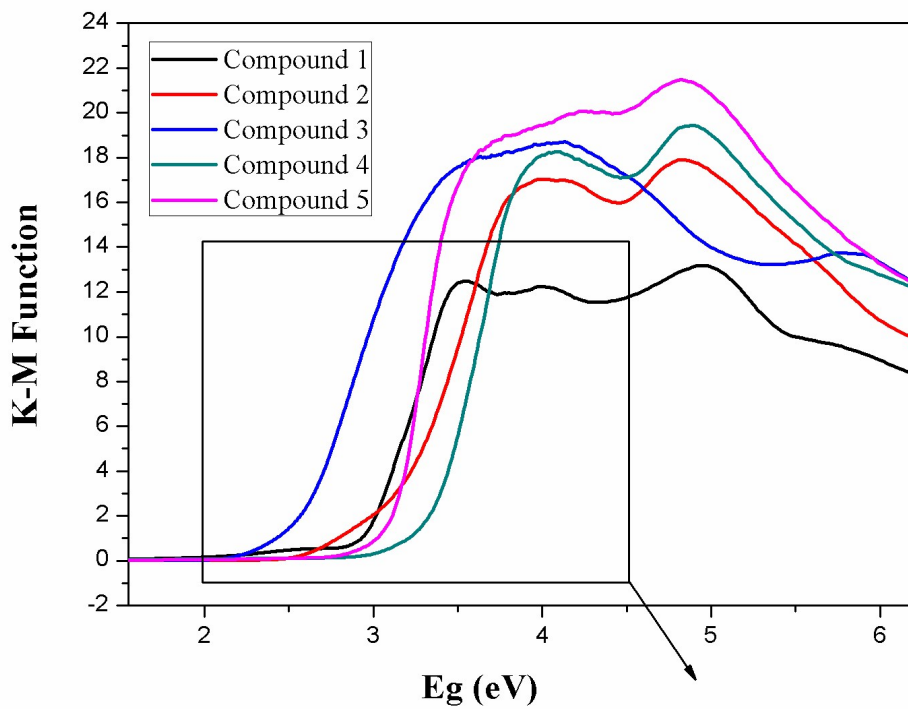

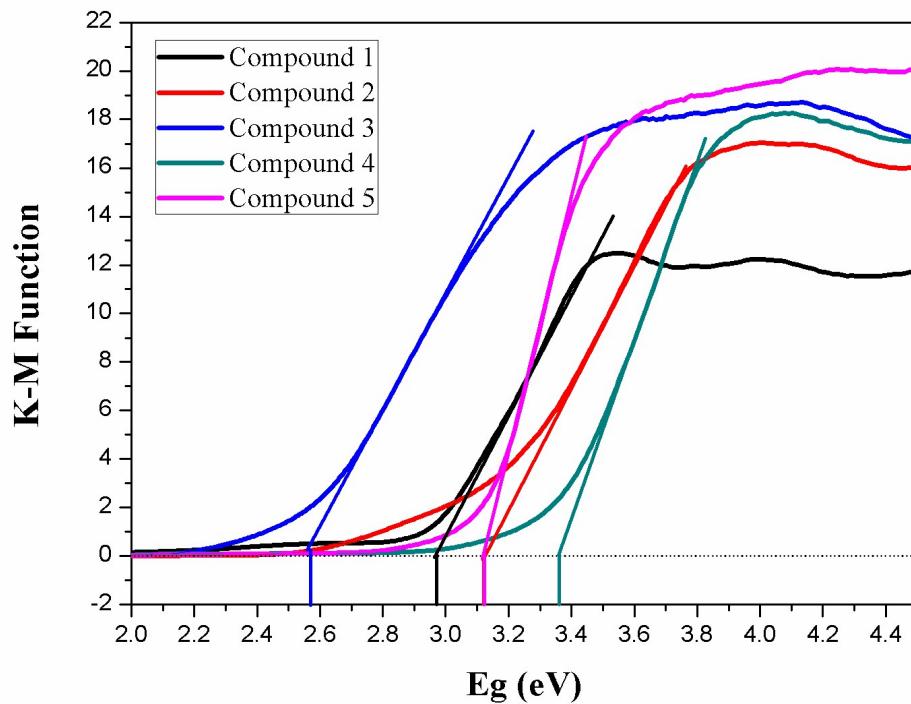

|                  | Compound<br><b>1</b> | Compound<br><b>2</b> | Compound<br><b>3</b> | Compound<br><b>4</b> | Compound<br><b>5</b> |
|------------------|----------------------|----------------------|----------------------|----------------------|----------------------|
| Band gap<br>(eV) | 2.96                 | 3.12                 | 2.56                 | 3.36                 | 3.12                 |



**Figure S6.** Optical photograph of antibacterial and antifungal tests of 1-5, (a) *Bacillus pumilus*; (b) *Bacillus subtilis*; (c) *Staphylococcus aureus*; (d) *Escherichia coli*; (e) *Aspergillus niger*; (f) *Canidia albicans*.

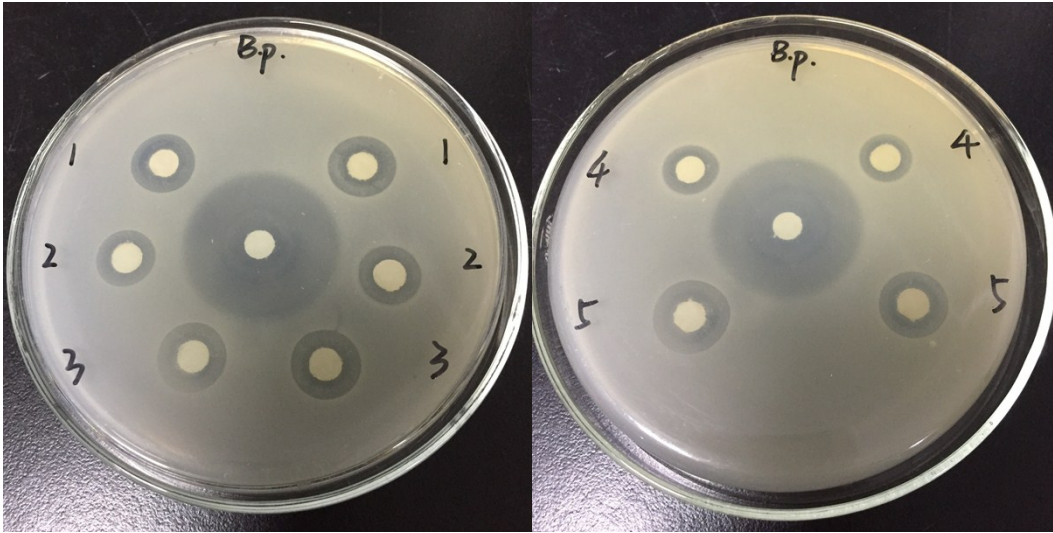

(a)

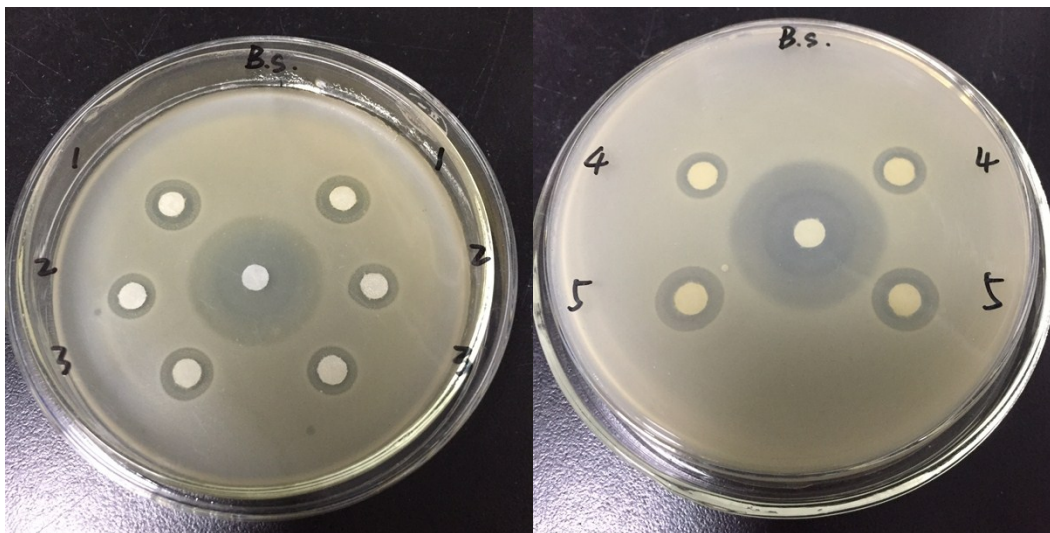

(b)

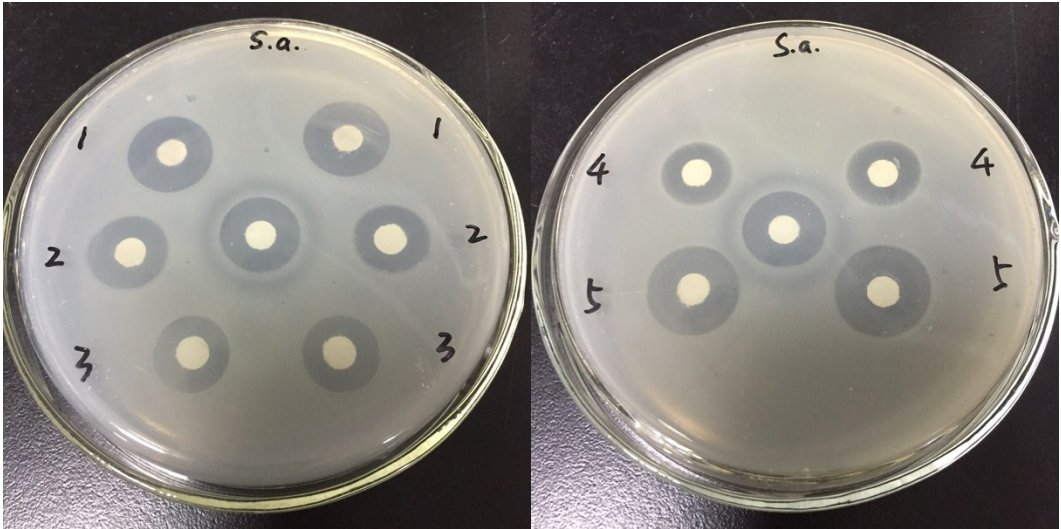

(c)

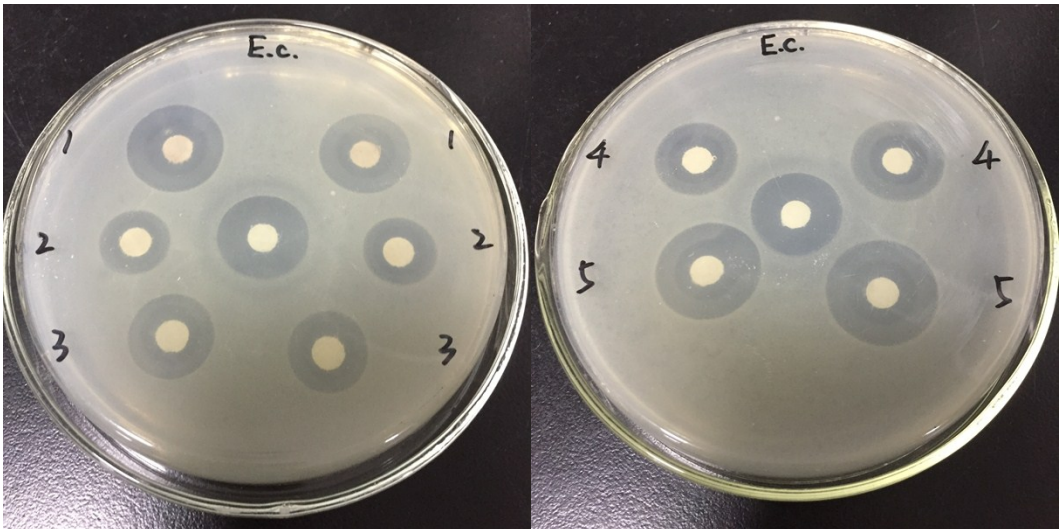

(d)

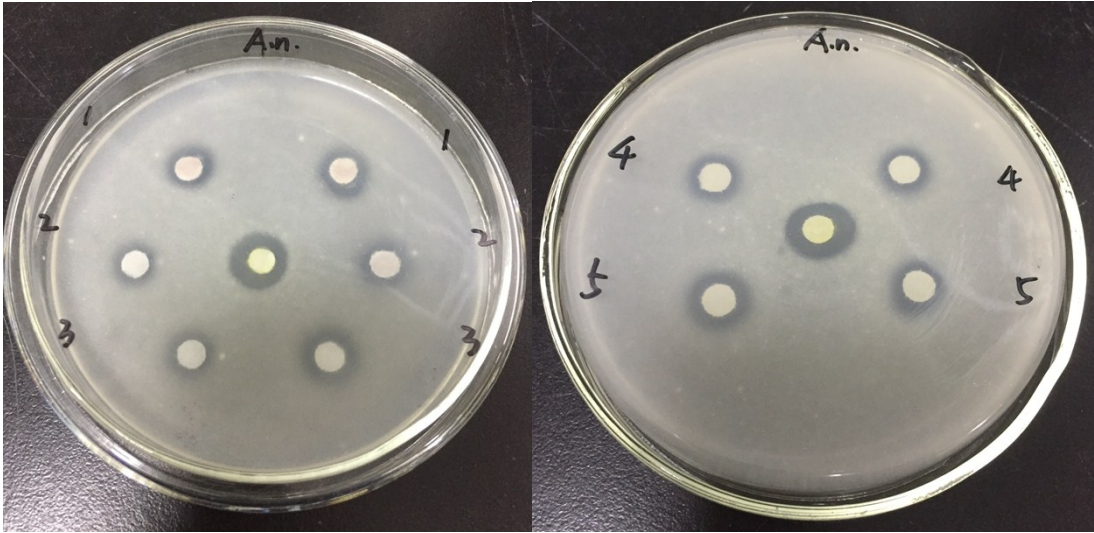

(e)

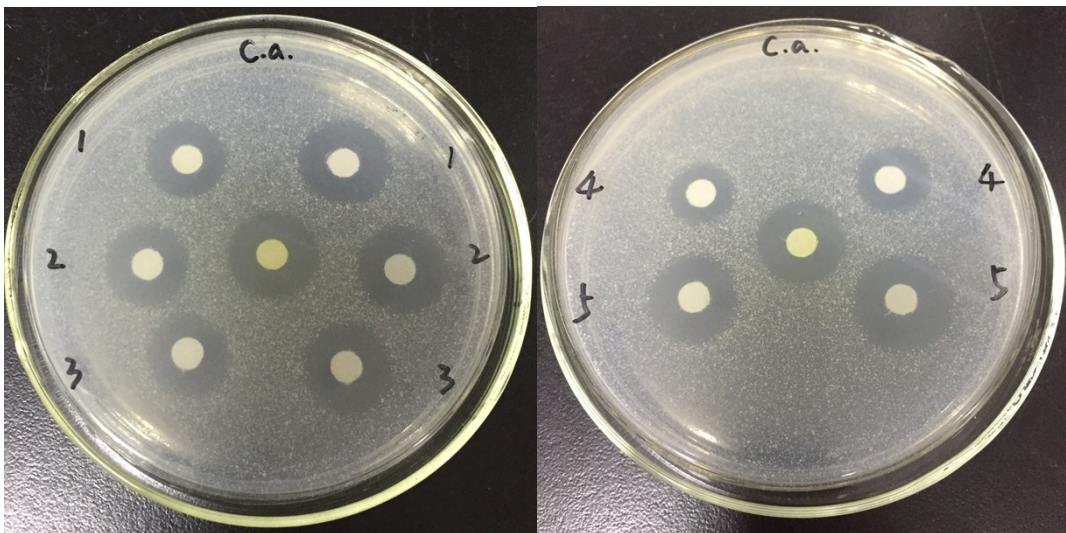

(f)

**Figure S7.**  $^1\text{H}$  NMR spectra of compounds **1-5**.

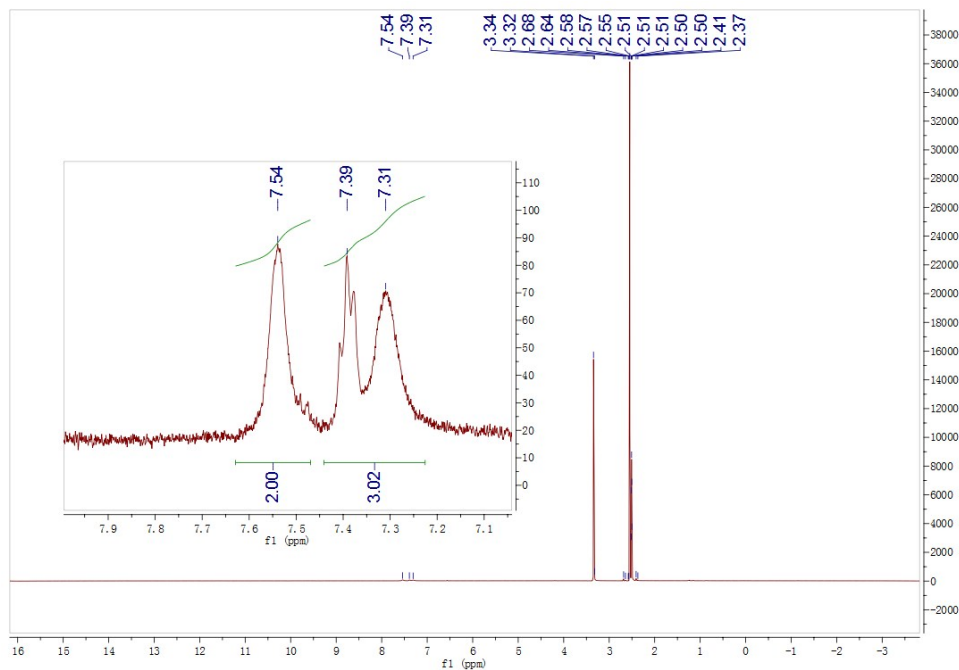

(1)

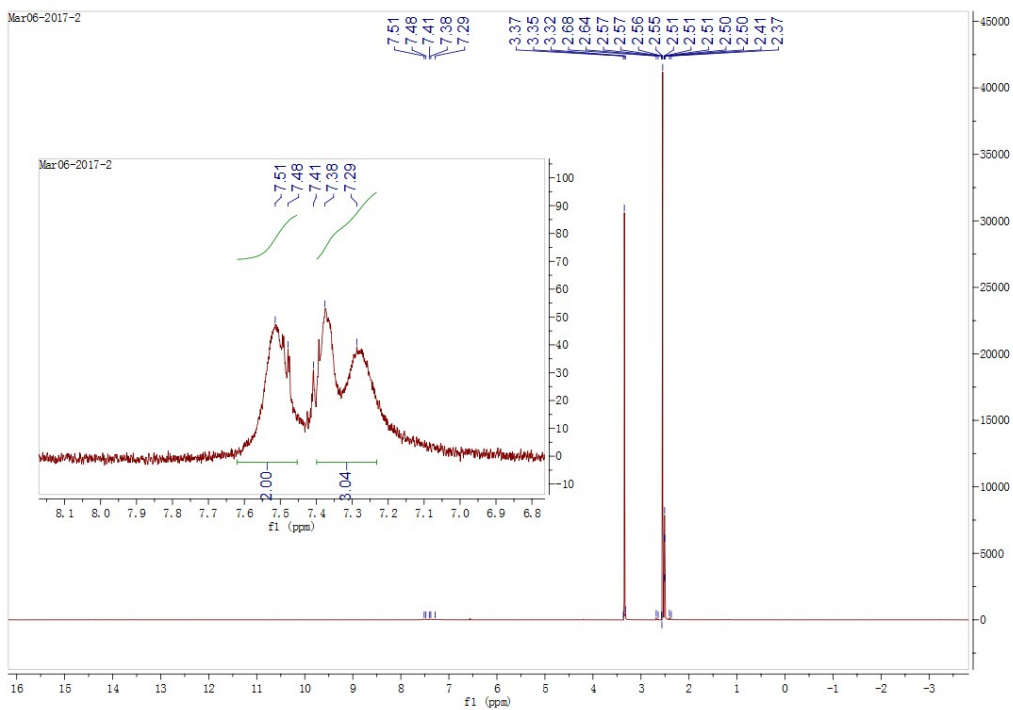

(2)

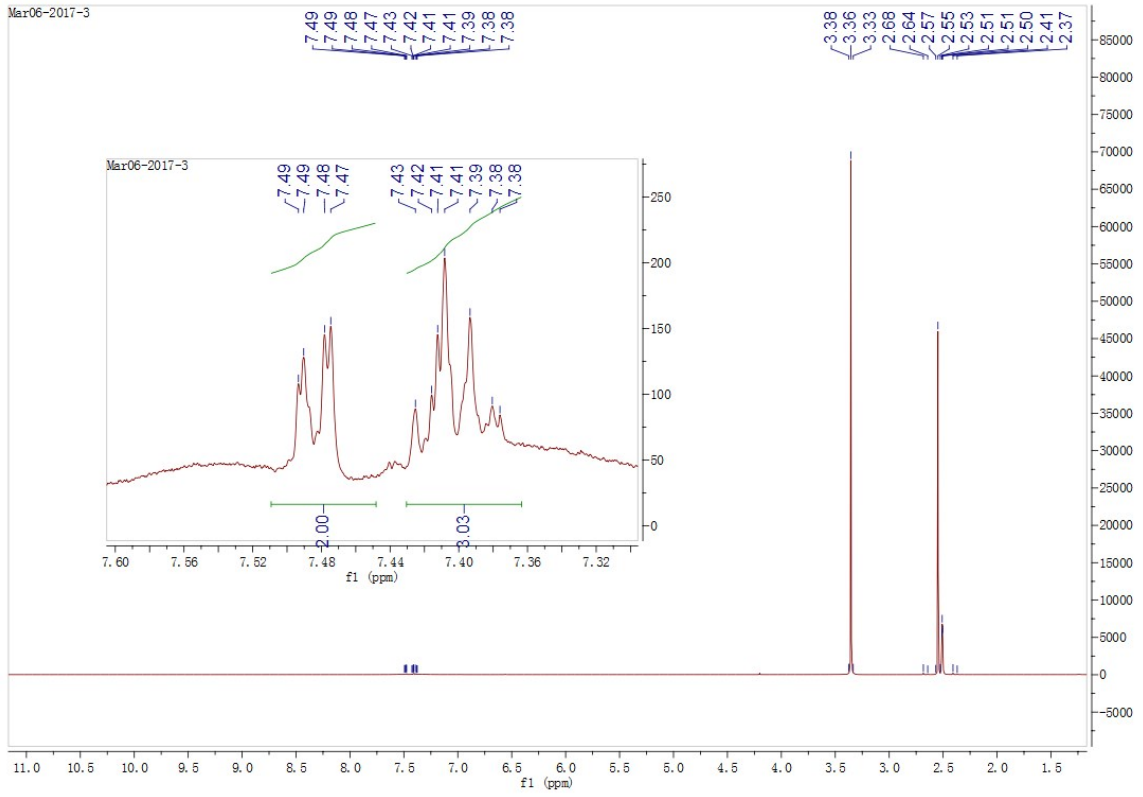

(3)

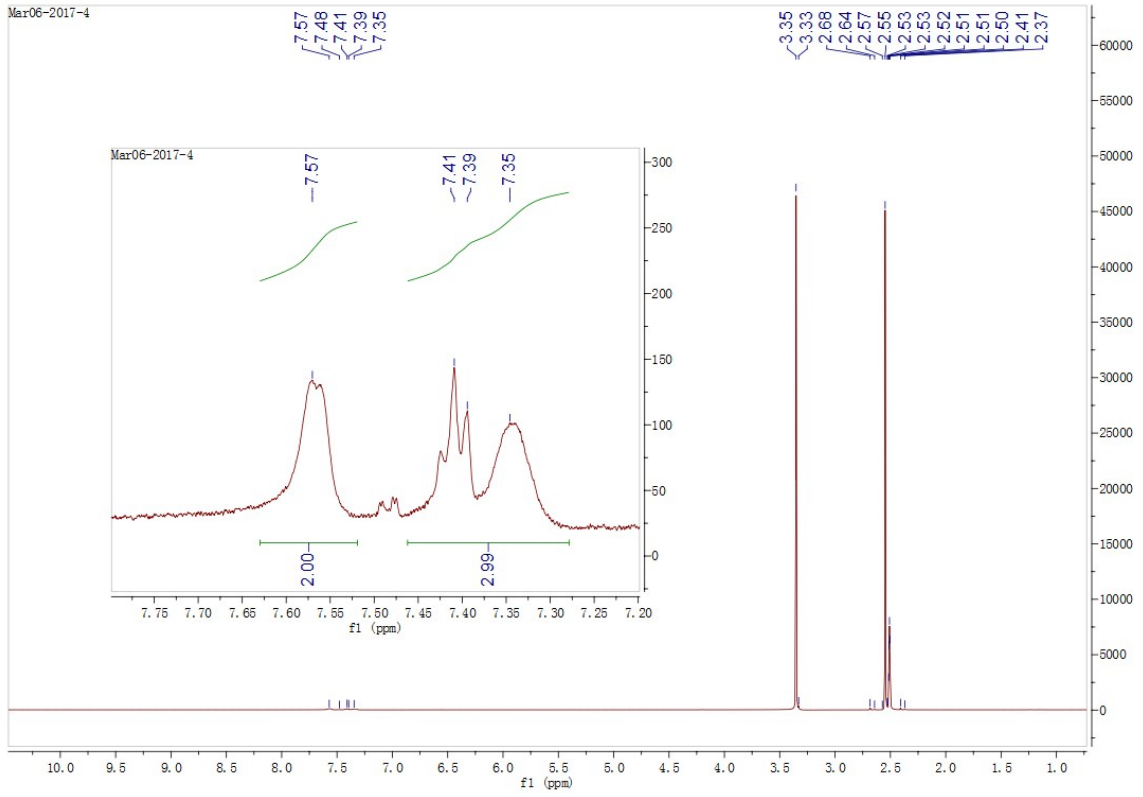

(4)

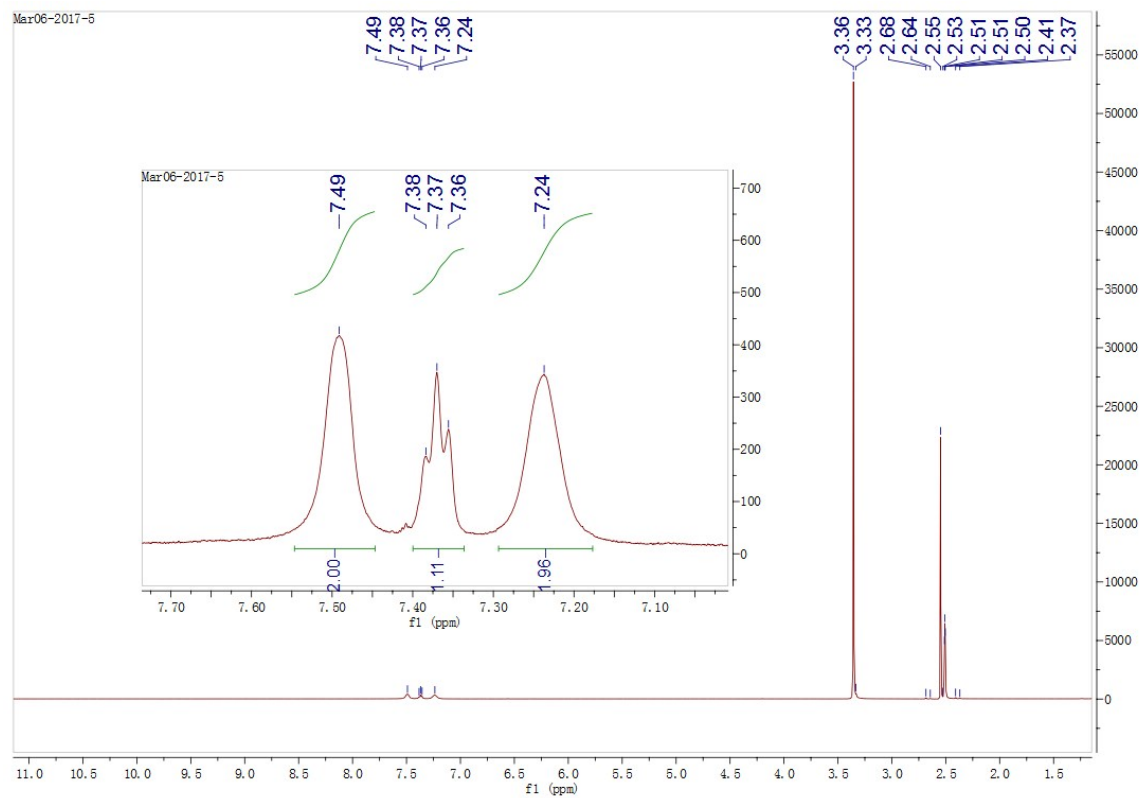

(5)
